# Supplementary material
Source: MDPI journal article supplement (https://www.mdpi.com/2071-1050/12/17/6978)
Supplement: s1 [file s1]

**Table 2:** Fossil CO<sub>2</sub> Inventory substances' contribution to impact category having a threshold of 2% (cut off 2%), for CT treatment. Total includes all groups; here only two are presented, CT biomass and operations.

| No | Substance                 | Compartment | Unit | Total | CT | Operation |
|----|---------------------------|-------------|------|-------|----|-----------|
|    | Total of all compartments |             | %    | 100   | 23 | 10        |
|    | Remaining substances      |             | %    | 0     | 0  | 0         |
| 1  | Carbon dioxide, fossil    | Air         | %    | 66    | 2  | 10        |
| 2  | Dinitrogen monoxide       | Air         | %    | 31    | 21 | 0         |
| 3  | Methane, fossil           | Air         | %    | 3     | 0  | 0         |

**Table 3:** Particular Matter formation Inventory substances' contribution to impact category having a threshold of 2% (cut off 2%), for CT treatment. Total includes all groups; here only two are presented, CT biomass and operations.

| N<br>o | Substance                         | Compartment | Unit | Total | CT | Operation |
|--------|-----------------------------------|-------------|------|-------|----|-----------|
|        | Total of all compartments         |             | %    | 100   | 25 | 17        |
|        | Remaining substances              |             | %    | 0     | 0  | 0         |
| 1      | Ammonia                           | Air         | %    | 26    | 24 | 0         |
| 2      | Nitrogen oxides                   | Air         | %    | 25    | 1  | 11        |
| 3      | Particulates, < 2.5 um            | Air         | %    | 20    | 0  | 6         |
| 4      | Particulates, > 2.5 um, and <10um | Air         | %    | 9     | 0  | 0         |
| 5      | Sulfur dioxide                    | Air         | %    | 20    | 0  | 0         |

**Table 4:** Fossil CO<sub>2</sub> Inventory substances' contribution to impact category having a threshold of 2% (cut off 2%), for RT I treatment. Total includes all groups; here only two are presented, RT I biomass and operations.

| No | Substance                 | Compartment | Unit | Total | RT I<br>biomass | Operations |
|----|---------------------------|-------------|------|-------|-----------------|------------|
|    | Total of all compartments |             | %    | 100   | 24              | 7          |
|    | Remaining substances      |             | %    | 0     | 0               | 0          |
| 1  | Carbon dioxide, fossil    | Air         | %    | 64    | 2               | 7          |
| 2  | Dinitrogen monoxide       | Air         | %    | 33    | 22              | 0          |
| 3  | Methane, fossil           | Air         | %    | 3     | 0               | 0          |

**Table 5:** Particular Matter formation Inventory substances' contribution to impact category having a threshold of 2% (cut off 2%), for RT I treatment. Total includes all groups; here only two are presented RT I biomass and operations.

| No | Substance                 | Compartment | Unit | Total | RT I<br>biomass | Operations |
|----|---------------------------|-------------|------|-------|-----------------|------------|
|    | Total of all compartments |             | %    | 100   | 27              | 11         |
|    | Remaining substances      |             | %    | 0     | 0               | 0          |
| 1  | Ammonia                   | Air         | %    | 29    | 26              | 0          |
| 2  | Nitrogen oxides           | Air         | %    | 23    | 1               | 8          |
| 3  | Particulates, < 2.5 um    | Air         | %    | 18    | 0               | 4          |

|   |                                   |     |   |    |   |   |
|---|-----------------------------------|-----|---|----|---|---|
| 4 | Particulates, > 2.5 um, and <10um | Air | % | 9  | 0 | 0 |
| 5 | Sulfur dioxide                    | Air | % | 21 | 0 | 0 |

**Table 6:** Fossil CO2 Inventory substances' contribution to impact category having a threshold of 2% (cut off 2%), for RT II treatment. Total includes all groups; here only two are presented, RT I biomass and operations.

| No | Substance                 | Compartment | Unit | Total | RT II biomass | Operations |
|----|---------------------------|-------------|------|-------|---------------|------------|
|    | Total of all compartments |             | %    | 100   | 24            | 6          |
|    | Remaining substances      |             | %    | 0     | 0             | 0          |
| 1  | Carbon dioxide, fossil    | Air         | %    | 64    | 2             | 6          |
| 2  | Dinitrogen monoxide       | Air         | %    | 33    | 22            | 0          |
| 3  | Methane, fossil           | Air         | %    | 3     | 0             | 0          |

**Table 7:** Particular Matter formation Inventory substances' contribution to impact category having a threshold of 2% (cut off 2%), for RT I treatment. Total includes all groups; here only two are presented RT II biomass and operations.

| No | Substance                        | Compartment | Unit | Total | RT II biomass | Operations |
|----|----------------------------------|-------------|------|-------|---------------|------------|
|    | Total of all compartments        |             | %    | 100   | 28            | 11         |
|    | Remaining substances             |             | %    | 0     | 0             | 0          |
| 1  | Ammonia                          | Air         | %    | 29    | 26            | 0          |
| 2  | Nitrogen oxides                  | Air         | %    | 22    | 1             | 7          |
| 3  | Particulates, < 2.5 um           | Air         | %    | 18    | 0             | 4          |
| 4  | Particulates, >2.5 um, and <10um | Air         | %    | 9     | 0             | 0          |
| 5  | Sulfur dioxide                   | Air         | %    | 21    | 0             | 0          |

**Table 8:** Fossil CO2 Inventory substances' contribution to impact category having a threshold of 2% (cut off 2%), for RT III treatment. Total includes all groups; here only two are presented, RT III biomass and operations.

| No | Substance                 | Compartment | Unit | Total | RT III biomass | Operations |
|----|---------------------------|-------------|------|-------|----------------|------------|
|    | Total of all compartments |             | %    | 100   | 24             | 7          |
|    | Remaining substances      |             | %    | 0     | 0              | 0          |
| 1  | Carbon dioxide, fossil    | Air         | %    | 64    | 2              | 7          |
| 2  | Dinitrogen monoxide       | Air         | %    | 33    | 22             | 0          |
| 3  | Methane, fossil           | Air         | %    | 3     | 0              | 0          |

**Table 9:** Particular Matter formation Inventory substances' contribution to impact category having a threshold of 2% (cut off 2%), for RT III treatment. Total includes all groups; here only two are presented RT III biomass and operations.

| No | Substance                 | Compartment | Unit | Total | RT III biomass | Operations |
|----|---------------------------|-------------|------|-------|----------------|------------|
|    | Total of all compartments |             | %    | 100   | 27             | 12         |

|          |                                    |     |   |    |    |   |
|----------|------------------------------------|-----|---|----|----|---|
|          | Remaining substances               |     | % | 0  | 0  | 0 |
| <b>1</b> | Ammonia                            | Air | % | 28 | 26 | 0 |
| <b>2</b> | Nitrogen oxides                    | Air | % | 23 | 1  | 8 |
| <b>3</b> | Particulates, < 2.5 um             | Air | % | 19 | 0  | 4 |
| <b>4</b> | Particulates, > 2.5 um, and < 10um | Air | % | 9  | 0  | 0 |
| <b>5</b> | Sulfur dioxide                     | Air | % | 21 | 0  | 0 |

**Table 10:** Fossil CO2 Inventory substances' contribution to impact category having a threshold of 2% (cut off 2%), for NT treatment. Total includes all groups; here only two are presented, NT biomass and operations.

| No       | Substance                 | Compartment | Unit | Total | NT biomass | Operations |
|----------|---------------------------|-------------|------|-------|------------|------------|
|          | Total of all compartments |             | %    | 100   | 25         | 4          |
|          | Remaining substances      |             | %    | 0     | 0          | 0          |
| <b>1</b> | Carbon dioxide, fossil    | Air         | %    | 62    | 2          | 4          |
| <b>2</b> | Dinitrogen monoxide       | Air         | %    | 35    | 23         | 0          |
| <b>3</b> | Methane, fossil           | Air         | %    | 3     | 0          | 0          |

**Table 11:** Particular Matter formation Inventory substances' contribution to impact category having a threshold of 2% (cut off 2%), for RT III treatment. Total includes all groups; here only two are presented RT III biomass and operations.

| No       | Substance                          | Compartment | Unit | Total | NT biomass | Operations |
|----------|------------------------------------|-------------|------|-------|------------|------------|
|          | Total of all compartments          |             | %    | 100   | 29         | 7          |
|          | Remaining substances               |             | %    | 0     | 0          | 0          |
| <b>1</b> | Ammonia                            | Air         | %    | 31    | 28         | 0          |
| <b>2</b> | Nitrogen oxides                    | Air         | %    | 21    | 1          | 5          |
| <b>3</b> | Particulates, < 2.5 um             | Air         | %    | 17    | 0          | 2          |
| <b>4</b> | Particulates, > 2.5 um, and < 10um | Air         | %    | 9     | 0          | 0          |
| <b>5</b> | Sulfur dioxide                     | Air         | %    | 22    | 0          | 0          |
