# Supplementary material
Source: MDPI journal article supplement (https://www.mdpi.com/2071-1050/12/17/6978)
Supplement: s1 [file s1]

**Table S1.** Impact assessment results using ReCiPe 1.11 + Pfister et al (2010) endpoint method

| Impact assessment results       | Unit       | CT       | Importance | RT I C   | Importance | RT II S  | Importance | RT III R | Importance | NT       | Importance |
|---------------------------------|------------|----------|------------|----------|------------|----------|------------|----------|------------|----------|------------|
| Climate change Human Health     | DALY       | 6,98E-07 | 64,0%      | 5,54E-07 | 58,6%      | 4,09E-07 | 56,5%      | 5,42E-07 | 58,2%      | 4,38E-07 | 53,2%      |
| Ozone depletion                 | DALY       | 1,04E-10 | 0,0%       | 9,95E-11 | 0,0%       | 7,91E-11 | 0,0%       | 9,78E-11 | 0,0%       | 9,48E-11 | 0,0%       |
| Human toxicity                  | DALY       | 3,19E-08 | 2,9%       | 3,29E-08 | 3,5%       | 2,67E-08 | 3,7%       | 3,26E-08 | 3,5%       | 3,46E-08 | 4,2%       |
| Photochemical oxidant formation | DALY       | 7,98E-11 | 0,0%       | 7,19E-11 | 0,0%       | 5,76E-11 | 0,0%       | 7,24E-11 | 0,0%       | 6,54E-11 | 0,0%       |
| Particulate matter formation    | DALY       | 3,47E-07 | 31,8%      | 3,43E-07 | 36,3%      | 2,76E-07 | 38,1%      | 3,41E-07 | 36,6%      | 3,35E-07 | 40,7%      |
| Ionising radiation              | DALY       | 2,60E-10 | 0,0%       | 2,50E-10 | 0,0%       | 2,00E-10 | 0,0%       | 2,47E-10 | 0,0%       | 2,40E-10 | 0,0%       |
| Water scarcity HH               | DALY       | 1,36E-08 | 1,2%       | 1,48E-08 | 1,6%       | 1,20E-08 | 1,7%       | 1,45E-08 | 1,6%       | 1,55E-08 | 1,9%       |
| <i>Sub-total</i>                |            | 1,09E-06 | 100,0%     | 9,45E-07 | 100%       | 7,24E-07 | 100%       | 9,31E-07 | 100%       | 8,24E-07 | 100%       |
| Climate change Ecosystems       | species.yr | 3,95E-09 | 18,4%      | 3,14E-09 | 14,1%      | 2,32E-09 | 13,1%      | 3,07E-09 | 14,1%      | 2,48E-09 | 11,0%      |
| Terrestrial acidification       | species.yr | 2,83E-11 | 0,1%       | 2,94E-11 | 0,1%       | 2,37E-11 | 0,1%       | 2,90E-11 | 0,1%       | 2,99E-11 | 0,1%       |
| Freshwater eutrophication       | species.yr | 2,51E-12 | 0,0%       | 2,70E-12 | 0,0%       | 2,18E-12 | 0,0%       | 2,65E-12 | 0,0%       | 2,80E-12 | 0,0%       |

|                                     |            |          |       |          |       |          |       |          |       |          |       |
|-------------------------------------|------------|----------|-------|----------|-------|----------|-------|----------|-------|----------|-------|
| <b>Terrestrial ecotoxicity</b>      | species.yr | 2,21E-11 | 0,1%  | 2,39E-11 | 0,1%  | 1,93E-11 | 0,1%  | 2,34E-11 | 0,1%  | 1,38E-10 | 0,6%  |
| <b>Freshwater ecotoxicity</b>       | species.yr | 2,49E-13 | 0,0%  | 2,57E-13 | 0,0%  | 2,07E-13 | 0,0%  | 2,54E-13 | 0,0%  | 2,89E-13 | 0,0%  |
| <b>Marine ecotoxicity</b>           | species.yr | 1,12E-13 | 0,0%  | 1,16E-13 | 0,0%  | 9,41E-14 | 0,0%  | 1,15E-13 | 0,0%  | 1,18E-13 | 0,0%  |
| <b>Agricultural land occupation</b> | species.yr | 1,63E-08 | 76,0% | 1,78E-08 | 80,1% | 1,44E-08 | 81,1% | 1,74E-08 | 80,1% | 1,87E-08 | 82,6% |
| <b>Urban land occupation</b>        | species.yr | 1,89E-10 | 0,9%  | 1,91E-10 | 0,9%  | 1,55E-10 | 0,9%  | 1,91E-10 | 0,9%  | 1,94E-10 | 0,9%  |
| <b>Natural land transformation</b>  | species.yr | 1,25E-10 | 0,6%  | 1,18E-10 | 0,5%  | 9,35E-11 | 0,5%  | 1,16E-10 | 0,5%  | 1,11E-10 | 0,5%  |
| <b>Water scarcity EQ</b>            | species.yr | 8,43E-10 | 3,9%  | 9,22E-10 | 4,1%  | 7,45E-10 | 4,2%  | 9,02E-10 | 4,1%  | 9,67E-10 | 4,3%  |
| <b>Sub-total</b>                    |            | 2,15E-08 | 100%  | 2,22E-08 | 100%  | 1,77E-08 | 100%  | 2,18E-08 | 100%  | 2,26E-08 | 100%  |
| <b>Metal depletion</b>              | \$         | 3,47E-03 | 5,3%  | 3,32E-03 | 4,8%  | 2,77E-03 | 5%    | 3,46E-03 | 5,1%  | 3,21E-03 | 4,5%  |
| <b>Fossil depletion</b>             | \$         | 1,96E-02 | 29,9% | 1,95E-02 | 28,1% | 1,56E-02 | 28%   | 1,92E-02 | 28,2% | 1,91E-02 | 26,9% |
| <b>Water scarcity R</b>             | \$         | 4,26E-02 | 64,8% | 4,66E-02 | 67,1% | 3,76E-02 | 67%   | 4,56E-02 | 66,8% | 4,89E-02 | 68,6% |
| <b>Sub-total</b>                    |            | 6,57E-02 | 100%  | 6,94E-02 | 100%  | 5,60E-02 | 100%  | 6,82E-02 | 100%  | 7,12E-02 | 100%  |
